# Supplementary material
Source: publisher figshare collection journal article supplement (https://sage.figshare.com/ndownloader/files/19147241)
Supplement: Supplementary file 1 [file 19147241]

## Supplementary Information

**Table S1. Regional [ $^{18}\text{F}$ ]FPEB  $V_T/f_p$  values and effect sizes**

| Region              | Baseline<br>$V_T/f_p$ | Post-<br>ketamine<br>$V_T/f_p$ | 24hr post-<br>ketamine<br>$V_T/f_p$ | Baseline vs. post-<br>ketamine<br><br>Cohen's d | Baseline vs.<br>24hr post-<br>ketamine<br><br>Cohen's d |
|---------------------|-----------------------|--------------------------------|-------------------------------------|-------------------------------------------------|---------------------------------------------------------|
| <b>Frontal cx</b>   | 484.3<br>(74.03)      | 434.8 (58.8)                   | 464.81 (76.2)                       | 0.80                                            | 0.23                                                    |
| <b>Parietal cx</b>  | 476.4 (84.3)          | 425.1 (65.8)                   | 453.0 (76.6)                        | 0.75                                            | 0.28                                                    |
| <b>Temporal cx</b>  | 544.9<br>(101.0)      | 492.6 (67.9)                   | 518.0 (88.8)                        | 0.69                                            | 0.30                                                    |
| <b>Occipital cx</b> | 440.3 (80.1)          | 389.1 (47.3)                   | 418.5 (68.8)                        | 0.77                                            | 0.27                                                    |
| <b>Cerebellum</b>   | 201.7 (35.5)          | 180.5 (39.0)                   | 195.8 (37.8)                        | 0.71                                            | 0.18                                                    |

Values are presented as mean (SD).

**Table S2. Regional [ $^{18}\text{F}$ ]FPEB  $V_T$  values and effect sizes**

| Region              | Baseline<br>$V_T$ | Post-<br>ketamine<br>$V_T$ | 24hr post-<br>ketamine<br>$V_T$ | Baseline vs. post-<br>ketamine<br><br>Cohen's d | Baseline vs.<br>24hr post-<br>ketamine<br><br>Cohen's d |
|---------------------|-------------------|----------------------------|---------------------------------|-------------------------------------------------|---------------------------------------------------------|
| <b>Frontal cx</b>   | 20.3 (3.4)        | 19.9 (2.5)                 | 21.5 (3.9)                      | 0.11                                            | 0.34                                                    |
| <b>Parietal cx</b>  | 20.0 (3.7)        | 19.4 (2.1)                 | 21.0 (3.4)                      | 0.13                                            | 0.29                                                    |
| <b>Temporal cx</b>  | 22.8 (4.1)        | 22.5 (2.5)                 | 23.9 (4.0)                      | 0.07                                            | 0.29                                                    |
| <b>Occipital cx</b> | 18.5 (3.7)        | 17.9 (2.7)                 | 19.4 (3.7)                      | 0.17                                            | 0.27                                                    |
| <b>Cerebellum</b>   | 8.4 (1.6)         | 8.2 (1.2)                  | 9.0 (1.7)                       | 0.12                                            | 0.37                                                    |

Values are presented as mean (SD).

**Table S3. Regional [ $^{11}\text{C}$ ]ABP688  $V_T$  values and effect sizes [previously collected data\*]**

| Region                       | Baseline<br>$V_T$ | Post-<br>ketamine<br>$V_T$ | 24hr post-<br>ketamine<br>$V_T$ | Baseline vs. post-<br>ketamine<br><br>Cohen's d | Baseline vs.<br>24hr post-<br>ketamine<br><br>Cohen's d |
|------------------------------|-------------------|----------------------------|---------------------------------|-------------------------------------------------|---------------------------------------------------------|
| <b>Anterior cingulate cx</b> | 4.72 (1.09)       | 3.73 (1.19)                | 3.54 (1.04)                     | 0.83                                            | 1.24                                                    |
| <b>Medial cx</b>             | 4.38 (1.02)       | 3.43 (1.02)                | 3.31 (1.06)                     | 0.92                                            | 1.23                                                    |
| <b>Orbital frontal cx</b>    | 4.29 (0.96)       | 3.44 (1.06)                | 3.27 (0.91)                     | 0.85                                            | 1.18                                                    |
| <b>Parietal cx</b>           | 4.17 (0.96)       | 3.24 (0.95)                | 3.22 (0.96)                     | 0.92                                            | 1.11                                                    |
| <b>Cerebellum</b>            | 2.24 (0.37)       | 2.02 (0.56)                | 1.89 (0.49)                     | 0.43                                            | 0.93                                                    |

Values are presented as mean (SD).

\*Data provided by Dr. Christine DeLorenzo, Stony Brook University.

## Explanation of $\Delta V_T / \Delta V_T / f_p$ in cerebellum

Due to a high fraction of specific binding in the cerebellum with [ $^{18}\text{F}$ ]FPEB,  $\Delta V_T$  is only expected to be marginally lower in the cerebellum than in high binding regions. In details, assuming that 1) the percent reduction of  $BP_{ND}$  due to ketamine,  $\Delta BP_{ND}$ , was uniform in the brain, and that 2) the non-displaceable volume of distribution  $V_{ND}$  is unchanged, then indeed  $\Delta V_T$  is expected to be regionally variant and equal to  $\Delta BP_{ND} * f_s$ , where  $f_s$  is the fraction of specific binding in each region:  $f_s = BP_{ND} / (1 + BP_{ND})$ .  $f_s$  has a non-linear relationship with  $BP_{ND}$  and flattens out at high  $BP_{ND}$  values.

In our previous study [DeLorenzo, JCBFM, 2017, see supplemental data<sup>1</sup>], the non-displaceable volume of distribution  $V_{ND}$  of FPEB were estimated to be and 1.7 mL/cm<sup>3</sup>, with a typical baseline  $V_T$  value of 7.9 mL/cm<sup>3</sup> in the cerebellum and ~20 mL/cm<sup>3</sup> in high binding regions. Thus, for [ $^{18}\text{F}$ ]FPEB  $BP_{ND}$  is ~ 3.6 in the cerebellum and ~11 in high binding regions, and  $f_s$  is ~ 0.8 in the cerebellum and ~0.92 in high binding regions. The  $\Delta V_T$  is only expected to be 14% lower in the cerebellum than in high binding regions. Thus, a 9% ketamine effect in high binding regions is expected to translate to an 8% ketamine effect in cerebellum. Thus, we cannot expect to reliably measure a lower ketamine effect in cerebellum with [ $^{18}\text{F}$ ]FPEB.

For comparison, for [ $^{11}\text{C}$ ]ABP688,  $V_{ND}$  was estimated to be 1.1 mL/cm<sup>3</sup> [DeLorenzo, JCBFM, 2017, see supplemental data<sup>1</sup>], with a typical baseline  $V_T$  of 1.9 mL/cm<sup>3</sup> in the cerebellum and ~3.5 mL/cm<sup>3</sup> in high binding regions. Thus, for [ $^{11}\text{C}$ ]ABP688  $BP_{ND}$  is ~0.73 in the cerebellum and ~2.2 in high binding regions, and  $f_s$  is ~0.42 in the cerebellum and ~0.69 in high binding regions. The  $\Delta V_T$  is now expected to be 39% lower in the cerebellum than in high binding regions. Thus, a 20% ketamine effect in high binding regions is expected to translate to an 12% ketamine effect in cerebellum. In the previous ketamine [ $^{11}\text{C}$ ]ABP688 study<sup>2</sup> the measured effects were 20% and 10% in cortex and cerebellum, respectively.

Thus, the relative results obtained with [ $^{18}\text{F}$ ]FPEB and [ $^{11}\text{C}$ ]ABP688 are consistent.

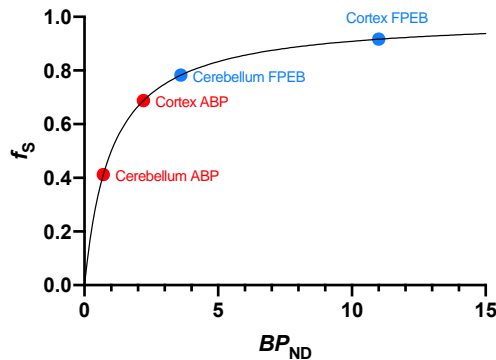

## References

1. DeLorenzo C, Gallezot J-D, Gardus J, Yang J, Planeta B, Nabulsi N, et al. (2017): In vivo variation in same-day estimates of metabotropic glutamate receptor subtype 5 binding using [11C] ABP688 and [18F] FPEB. 37:2716-2727.
2. DeLorenzo C, DellaGioia N, Bloch M, Sanacora G, Nabulsi N, Abdallah C, et al. (2015): In vivo ketamine-induced changes in [11C] ABP688 binding to metabotropic glutamate receptor subtype 5. 77:266-275.
